# Supplementary material for: Comparison Between Face-to-Face and Remote Education Based on Academic Performance and Student Satisfaction in a Medical School
Source: Research Square preprint supplement (doi:10.21203/rs.3.rs-7135151/v1), 2025-09-10
Supplement: Supplementary file 1 [file a20e5b11fcc2a614626ed0d3.docx]

Table S1. Comparison of students’ satisfaction with school courses based on the COVID-19 period

|  | Characteristics of the courses | | | Students’ satisfaction | | | |  |
| --- | --- | --- | --- | --- | --- | --- | --- | --- |
| Involving laboratory work | Change of instructors | Associated with NCBME subjects | All periods | Pre-pandemic  (2018-2019) | Pandemic  (2020-2021) | Post-pandemic (2022-2023) |  |
| Mean (SD) | Mean (SD) | Mean (SD) | Mean (SD) | *P* value |
| All courses |  |  |  | 4.2 (1.0) | 4.2 (0.9) | 4.1 (1.0) | 4.3 (1.0) | < 0.0001 |
| Course 01 | N | N | Y | 4.3 (0.9) | 4.3 (0.9) | 4.4 (0.8) | 4.3 (0.9) | 0.35 |
| Course 02 | N | N | N | 4.2 (1.0) | 4.0 (1.1) | 4.4 (0.9) | 4.2 (0.8) | < 0.0001 |
| Course 03 | Y | N | N | 4.4 (0.8) | 4.4 (0.8) | 4.4 (0.8) | 4.4 (0.8) | 0.40 |
| Course 04 | Y | N | Y | 4.1 (1.0) | 4.1 (0.9) | 3.9 (1.1) | 4.1 (1.0) | 0.41 |
| Course 05 | Y | Y | Y | 4.3 (0.9) | 4.3 (0.9) | 4.1 (1.1) | 4.4 (0.8) | < 0.0001 |
| Course 06 | Y | N | Y | 4.6 (0.8) | 4.5 (0.7) | 4.5 (1.0) | 4.6 (0.7) | 0.04 |
| Course 07 | N | N | Y | 4.5 (0.8) | 4.3 (0.9) | 4.8 (0.5) | 4.4 (0.7) | < 0.0001 |
| Course 08 | N | Y | Y | 4.1 (1.1) | 4.4 (0.7) | 4.3 (0.8) | 3.9 (1.3) | < 0.0001 |
| Course 09 | Y | Y | N | 4.1 (1.0) | 4.0 (1.1) | 3.9 (1.1) | 4.3 (1.0) | < 0.0001 |
| Course 10 | Y | N | Y | 4.5 (0.8) | 4.1 (1.1) | 4.5 (0.8) | 4.6 (0.7) | < 0.0001 |
| Course 11 | Y | N | Y | 4.1 (1.0) | 4.3 (0.8) | 3.8 (1.2) | 4.3 (0.9) | 0.28 |
| Course 12 | Y | N | Y | 4.6 (0.7) | 4.6 (0.7) | 4.7 (0.5) | 4.5 (0.8) | 0.15 |
| Course 13 | Y | Y | N | 4.0 (1.0) | 3.9 (1.2) | 3.9 (0.9) | 4.1 (1.1) | < 0.0001 |
| Course 14 | N | N | N | 4.3 (0.9) | 4.2 (1.0) | 4.3 (0.8) | 4.3 (1.0) | 0.0002 |

*P* values were estimated using ANOVA. NCBME: National Comprehensive Basic Medical Examination, SD: standard deviation
